# Supplementary material
Source: PubMed Central journal article supplement (PMC1863512)

**A**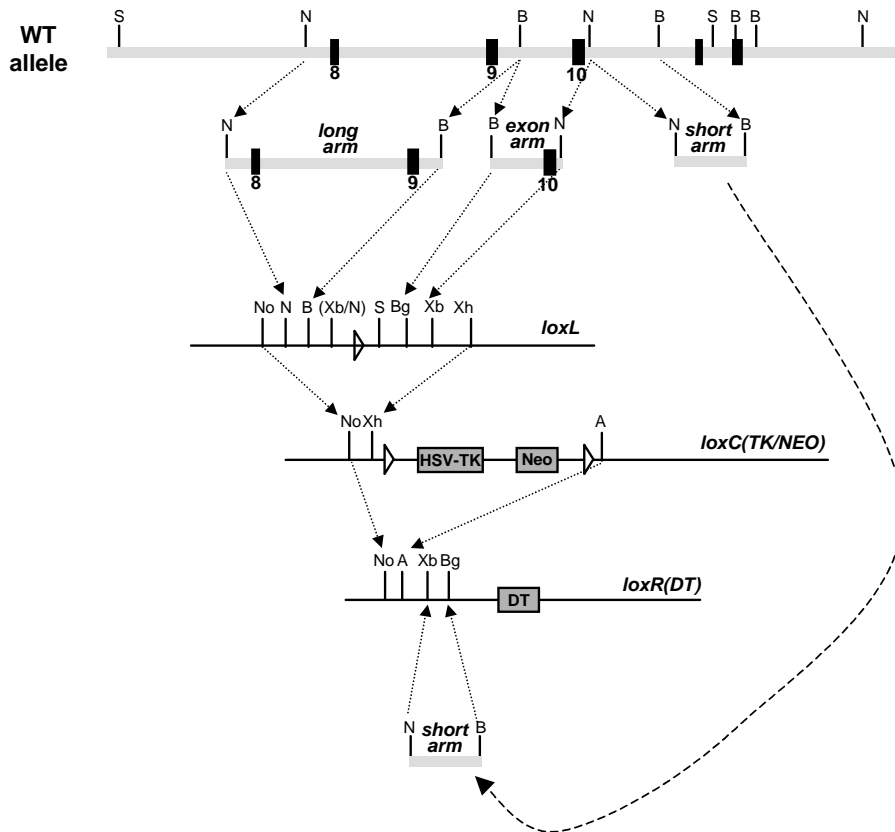**B**

**targeting  
vector**

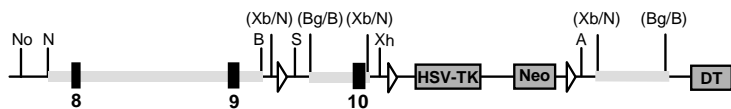

Supplement: pnas_0609778104_1.pdf [file pnas_0609778104_1.pdf]

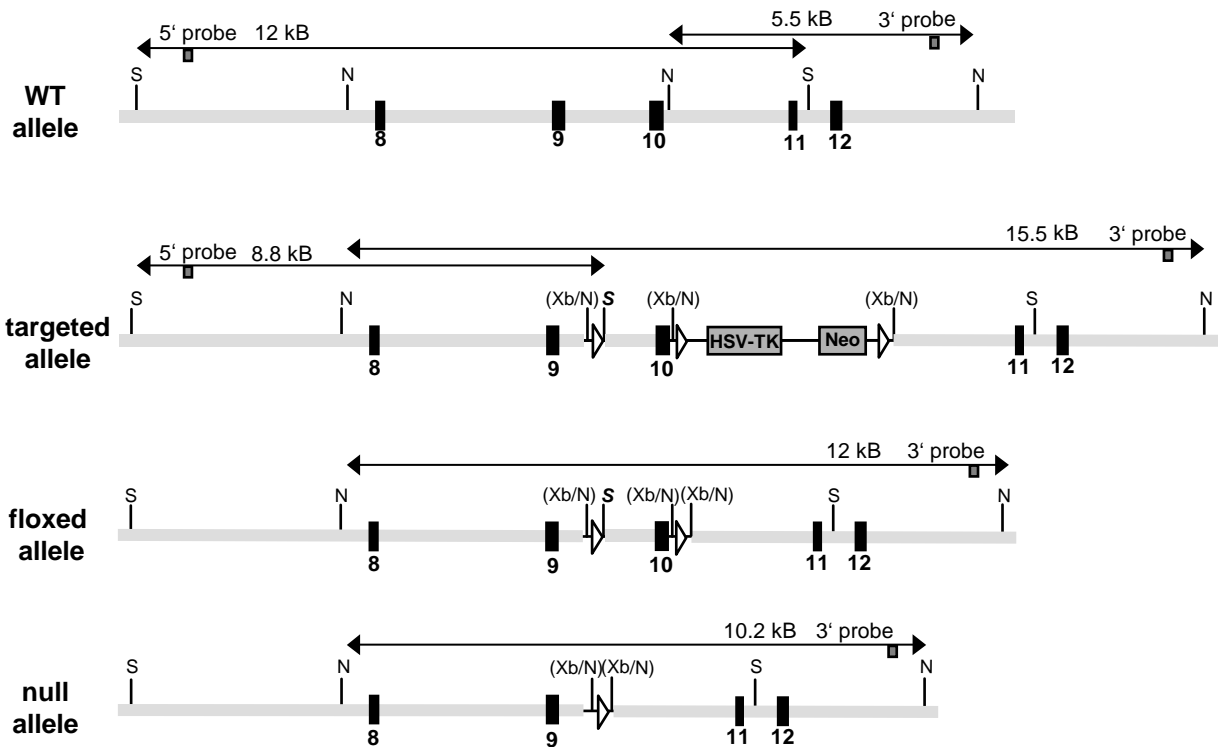

Supplement: pnas_0609778104_2.pdf [file pnas_0609778104_2.pdf]
